# Supplementary material for: Screening of Oral Potential Angiotensin-Converting Enzyme Inhibitory Peptides from Zizyphus jujuba Proteins Based on Gastrointestinal Digestion In Vivo
Source: MDPI journal article supplement (doi:10.3390/ijms242115848), 2023-10-31
Supplement: s1 [file s1]

# Screening of Oral Potential Angiotensin-Converting Enzyme Inhibitory Peptides from *Zizyphus jujuba* Proteins Based on Gastrointestinal Digestion In Vivo

Xinchang Gao <sup>1,2</sup>, Chaoying Zhang <sup>3</sup>, Ning Wang <sup>1</sup>, Jin-Ming Lin <sup>2</sup>, Yali Dang <sup>4,\*</sup> and Yufen Zhao <sup>1,2,\*</sup>

<sup>1</sup> Institute of Drug Discovery Technology, Ningbo University, Ningbo 315211, China; gxch43@126.com (X.G.); wangning2@nbu.edu.cn (N.W.)

<sup>2</sup> Department of Chemistry, Tsinghua University, Beijing 100084, China; jmlin@mail.tsinghua.edu.cn

<sup>3</sup> Chinese Academy of Fishery Sciences, Beijing 100141, China; cyzhang0317@cafs.ac.cn

<sup>4</sup> College of Food and Pharmaceutical Sciences, Ningbo University, Ningbo 315211, China

\* Correspondence: dangyali@nbu.edu.cn (Y.D.); yfzhao@tsinghua.edu.cn (Y.Z.)

**Table S1.** Bioactivity peptides of *Zizyphus jujuba* protein after silicon gastrointestinal digestion.

| No. | Uniprot ID | Description                                                                                              | Dipeptidyl<br>peptidase<br>IV inhibi-<br>tor | ACE in-<br>hibitor | Antioxida-<br>tive peptide | Glucose<br>uptake<br>stimulat-<br>ing pep-<br>tide | Renin<br>inhibi-<br>tor | DPP-III inhibi-<br>tor |
|-----|------------|----------------------------------------------------------------------------------------------------------|----------------------------------------------|--------------------|----------------------------|----------------------------------------------------|-------------------------|------------------------|
| 1   | A0A6P3ZWP5 | (R)-mandelo-<br>nitrile lyase 3-<br>like [Zizyphus<br>jujuba]                                            | 23                                           | 19                 | 2                          | 3                                                  | 2                       | 2                      |
| 2   | A0A6P3ZAQ7 | basic 7S glob-<br>ulin-like<br>[Zizyphus ju-<br>juba]                                                    | 32                                           | 12                 | 0                          | 4                                                  | 3                       | 5                      |
| 3   | A0A6P3ZF39 | heat shock<br>cognate 70<br>kDa protein<br>2-like<br>[Zizyphus ju-<br>juba]                              | 20                                           | 13                 | 3                          | 2                                                  | 2                       | 1                      |
| 4   | A0A6P4BEQ2 | probable me-<br>diator of RNA<br>polymerase II<br>transcription<br>subunit 37e<br>[Zizyphus ju-<br>juba] | 23                                           | 15                 | 3                          | 0                                                  | 1                       | 2                      |
| 5   | A0A6P4A5H0 | chaperone<br>protein ClpB1<br>[Zizyphus ju-<br>juba]                                                     | 33                                           | 37                 | 6                          | 4                                                  | 1                       | 1                      |
| 6   | A0A6P6GI53 | alpha-xylo-<br>sidase 1<br>[Zizyphus ju-<br>juba]                                                        | 59                                           | 39                 | 3                          | 4                                                  | 3                       | 6                      |

|       |            |                                                               |     |     |    |    |    |    |
|-------|------------|---------------------------------------------------------------|-----|-----|----|----|----|----|
| 7     | A0A6P4A0H8 | primary amine oxidase-like [Ziziphus jujuba]                  | 50  | 34  | 4  | 4  | 6  | 9  |
| 8     | A0A6P4A9Y3 | beta-galactosidase 8 isoform X1 [Ziziphus jujuba]             | 51  | 36  | 2  | 1  | 2  | 2  |
| 9     | A0A6P4ATG6 | GDSL esterase/lipase 1-like [Ziziphus jujuba]                 | 24  | 19  | 0  | 0  | 2  | 5  |
| 10    | A0A6P4ACD1 | V-type proton ATPase catalytic subunit A [Ziziphus jujuba]    | 29  | 18  | 3  | 1  | 3  | 1  |
| 11    | A0A6P4AUL2 | alpha-mannosidase-like [Ziziphus jujuba]                      | 60  | 45  | 8  | 3  | 4  | 6  |
| 12    | R4L6S9     | heat shock protein 70 [Ziziphus jujuba]                       | 20  | 13  | 4  | 2  | 1  | 1  |
| 13    | A0A6P3Z888 | heat shock cognate 70 kDa protein-like [Ziziphus jujuba]      | 25  | 13  | 3  | 2  | 1  | 2  |
| 14    | A0A6P4B4C0 | V-type proton ATPase subunit B 2 isoform X1 [Ziziphus jujuba] | 18  | 17  | 4  | 2  | 2  | 1  |
| 15    | A0A6P4AF39 | ATP synthase subunit beta, mitochondrial [Ziziphus jujuba]    | 16  | 18  | 4  | 4  | 1  | 2  |
| Total |            |                                                               | 483 | 348 | 49 | 36 | 34 | 46 |

**Table S2. Data of the 3D-QSAR model.**

| No | Sequences                                           | PIC50 | Predicted<br>PIC50 | Error |
|----|-----------------------------------------------------|-------|--------------------|-------|
| 1  | Leu-Pro-Gly-Val-Leu-Pro-Val-Ala*                    | 0.11  | -1.41              | 1.52  |
| 2  | Thr-Tyr-Leu-Pro-Val-His*                            | -0.14 | -1.35              | 1.21  |
| 3  | Pro-Thr-His-Ile-Lys-Trp-Gly-Asp                     | -0.18 | 0.04               | -0.22 |
| 4  | Phe-Gln-Lys-Val-Val-Ala-Lys*                        | -0.32 | -1.47              | 1.15  |
| 5  | Thr-Phe-Gln-Gly-Pro-Pro-His-Gly-Ile-Gln-Val-Glu-Arg | -0.53 | -0.66              | 0.13  |
| 6  | Tyr-Glu-Thr-Gly-Asn-Gly-Ile-Lys                     | -0.57 | -0.53              | -0.04 |
| 7  | Leu-Gly-Pro-Leu-Gly-His-Gln                         | -0.63 | -0.42              | -0.21 |
| 8  | Ile-Ile-Ala-Pro-Pro-Glu-Arg                         | -0.94 | -1.04              | 0.10  |
| 9  | Cys-Cys-Asn-Lys                                     | -0.95 | -1.01              | 0.06  |
| 10 | Ser-Leu-Pro-Gln-Asn                                 | -0.98 | -0.82              | -0.16 |
| 11 | Cys-Cys                                             | -0.99 | -1.39              | 0.40  |
| 12 | Leu-His-Pro-Gly-Asp-Ala-Gln-Arg                     | -1.01 | -0.98              | -0.03 |
| 13 | Leu-Val-Leu                                         | -1.09 | -1.34              | 0.25  |
| 14 | Leu-Val-Leu-Pro-Gly-Glu                             | -1.13 | -1.32              | 0.19  |
| 15 | Cys-Cys-Asn-Lys-Ser-Val*                            | -1.18 | -1.66              | 0.48  |
| 16 | Asn-Ile-Phe-Tyr-Cys-Pro                             | -1.18 | -1.25              | 0.07  |
| 17 | Ala-His-Ser-Val-Arg-Phe-Tyr*                        | -1.21 | -1.52              | 0.31  |
| 18 | Leu-Phe-Arg-Gln*                                    | -1.23 | -1.78              | 0.55  |
| 19 | Val-His-Leu-Pro-Pro*                                | -1.26 | -1.67              | 0.41  |
| 20 | Ala-His-Ser-Val-Arg-Phe*                            | -1.26 | -1.49              | 0.23  |
| 21 | Gly-Lys-Asp-Ala-Val-Ile-Val                         | -1.26 | -1.39              | 0.13  |
| 22 | Pro-Ala-Asn-Ile-Lys-Trp-Gly-Asp                     | -1.32 | -1.26              | -0.06 |
| 23 | Tyr-Pro-Gly                                         | -1.37 | -1.64              | 0.27  |
| 24 | Gly-Tyr-Ala-Leu-Pro-His-Ala                         | -1.44 | -1.16              | -0.28 |
| 25 | His-Cys-His-Thr-Asn*                                | -1.48 | -1.71              | 0.23  |
| 26 | Phe-Cys-Leu-Tyr-Glu-Leu-Ala-Arg                     | -1.50 | -1.45              | -0.05 |
| 27 | Leu-Gln-Lys-Trp*                                    | -1.54 | -1.81              | 0.27  |
| 28 | Val-Leu-Pro-Tyr-Pro                                 | -1.56 | -1.42              | -0.14 |
| 29 | Asp-Phe-Gly                                         | -1.65 | -1.66              | 0.01  |
| 30 | Leu-Pro-Gln-Asn-Ile-Leu-Pro*                        | -1.66 | -1.95              | 0.29  |
| 31 | Leu-Ala-Lys*                                        | -1.68 | -1.79              | 0.11  |
| 32 | Gly-Arg-Val-Ser-Asn-Cys-Ala-Ala                     | -1.76 | -1.75              | -0.01 |
| 33 | Asn-Met-Ala-Ile-Asn-Pro-Ser-Lys                     | -1.78 | -1.58              | -0.20 |
| 34 | Pro-Ser-Phe-Gln-Pro                                 | -1.86 | -1.96              | 0.10  |
| 35 | Gly-Ile-Pro-Leu-Pro-Leu-Ile                         | -1.87 | -2.19              | 0.32  |
| 36 | Tyr-Thr-Val-Phe                                     | -1.94 | -2.20              | 0.26  |
| 37 | Lys-Val-Arg-Glu-Gly-Thr-Thr-Tyr                     | -2.01 | -1.85              | -0.16 |
| 38 | His-Cys-His-Thr                                     | -2.06 | -2.18              | 0.12  |
| 39 | Phe-Pro-Glu-Val-Phe-Gly-Lys                         | -2.15 | -2.19              | 0.04  |
| 40 | Gln-Val-Gly-Pro                                     | -2.21 | -2.22              | 0.01  |
| 41 | Leu-Val-Leu-Pro-Gly-Glu-Leu-Ala-Lys                 | -2.26 | -2.43              | 0.17  |
| 42 | Ile-Gly-Pro-Gly-Leu-Gly-Arg                         | -2.32 | -2.19              | -0.13 |
| 43 | Ala-Asp-Gly-Leu-Trp-Leu                             | -2.45 | -2.21              | -0.24 |
| 44 | Phe-Pro-Gln-Tyr                                     | -2.48 | -2.38              | -0.10 |
| 45 | Lys-Ser-Val                                         | -3.01 | -2.81              | -0.20 |
| 46 | Ala-His-Ser-Val                                     | -3.26 | -2.83              | -0.43 |

\* Test set peptides (the external validation).

**Table S3. The actual active Zizyphus jujuba peptides in mice intestine.**

| No | Sequence                    | Lenth | ALC (%) | RT   | Area     | Mass     |
|----|-----------------------------|-------|---------|------|----------|----------|
| 1  | Val-Val-Lys-Val-Lys-Val-Pro | 7     | 93.1    | 40.8 | 1.72E+06 | 767.5269 |
| 2  | Pro-Arg-Pro-Lys-Pro-Pro-Pro | 7     | 87.5    | 38.6 | 7.42E+06 | 787.4705 |
| 3  | His-Leu-Lys-Pro-Asp-Gln     | 6     | 97.9    | 33.9 | 2.24E+06 | 736.3868 |
| 4  | Leu-Glu-Lys-Pro-Leu-Leu     | 6     | 97.4    | 46.8 | 3.10E+06 | 711.4531 |
| 5  | Thr-Val-Lys-Pro-Gly-Leu     | 6     | 87.8    | 36.3 | 7.18E+06 | 613.3799 |
| 6  | Glu-Leu-Tyr-Leu-Ala-Gly     | 6     | 87.4    | 39.0 | 7.05E+07 | 664.3431 |
| 7  | Leu-Asp-Phe-Ser-Gly-Ser     | 6     | 87.3    | 24.5 | 6.53E+06 | 624.2755 |
| 8  | Leu-Leu-Ala-Ala-Ala-Tyr     | 6     | 85.4    | 28.6 | 5.49E+06 | 620.3533 |
| 9  | Lys-Ala-Leu-Val-Ala-Pro     | 6     | 85.1    | 36.1 | 1.24E+06 | 597.3849 |
| 10 | Tyr-Gly-Gly-Gly-Gly-Pro     | 6     | 84.8    | 8.7  | 1.05E+06 | 506.2125 |
| 11 | Ser-Gly-Leu-Leu-Gly-Lys     | 6     | 83.3    | 57.1 | 3.45E+06 | 573.3486 |
| 12 | Glu-Tyr-Leu-Leu-Ala-Gly     | 6     | 83.1    | 42.4 | 3.06E+07 | 664.3431 |
| 13 | Leu-Glu-Lys-Leu-Val-Thr     | 6     | 82.5    | 36.9 | 2.27E+06 | 701.4323 |
| 14 | Glu-Phe-Thr-Leu-Val-Gly     | 6     | 82.4    | 38.5 | 2.83E+07 | 664.3431 |
| 15 | His-Leu-Val-Val-His         | 5     | 98.6    | 37.1 | 2.13E+06 | 603.3492 |
| 16 | Arg-Val-Pro-Pro-Arg         | 5     | 98      | 36.7 | 1.80E+07 | 623.3867 |
| 17 | His-Leu-Arg-Pro-Asn         | 5     | 95.8    | 34.9 | 3.09E+06 | 635.3503 |
| 18 | Arg-Leu-Pro-His-Val         | 5     | 93.9    | 44.6 | 4.92E+05 | 620.3758 |
| 19 | Lys-Leu-His-Pro-Val         | 5     | 93.3    | 43.3 | 4.12E+06 | 592.3696 |
| 20 | His-Pro-Pro-Pro-Pro         | 5     | 93.2    | 25.5 | 1.09E+07 | 543.2805 |
| 21 | His-Leu-Lys-Pro-Val         | 5     | 92.8    | 43.3 | 4.12E+06 | 592.3696 |
| 22 | Gln-Ala-Pro-Ser-Val         | 5     | 92.4    | 12.7 | 2.94E+06 | 500.2595 |
| 23 | Lys-Val-Arg-Pro-Leu         | 5     | 92.1    | 40.3 | 2.09E+06 | 611.4119 |
| 24 | Leu-Pro-Lys-Glu-Pro         | 5     | 88.9    | 27.8 | 8.51E+06 | 582.3377 |
| 25 | Lys-Val-Leu-Gln-Pro         | 5     | 87.6    | 30.4 | 1.17E+07 | 583.3693 |
| 26 | Lys-Val-Lys-Pro-Leu         | 5     | 86.1    | 46.3 | 2.27E+06 | 583.4057 |
| 27 | Glu-Pro-Val-Leu-Lys         | 5     | 86      | 34.0 | 1.10E+06 | 584.3533 |
| 28 | Ser-Leu-Leu-Gly-Lys         | 5     | 85.8    | 54.6 | 1.46E+07 | 516.3271 |
| 29 | Glu-Gly-Gly-Gly-Lys         | 5     | 85.7    | 26.4 | 9.55E+06 | 446.2125 |
| 30 | Val-Asn-Leu-Asp-Thr         | 5     | 85.2    | 13.0 | 5.65E+06 | 560.2806 |
| 31 | Asp-Gly-Phe-Ser-Leu         | 5     | 85.1    | 37.0 | 3.43E+06 | 537.2435 |
| 32 | Gln-Val-Leu-Pro-Lys         | 5     | 84.9    | 37.3 | 6.57E+05 | 583.3693 |
| 33 | Asp-Gly-Ser-Ser-Phe         | 5     | 84.8    | 15.8 | 3.28E+06 | 511.1914 |
| 34 | Gln-Gly-Ala-Pro-Arg         | 5     | 84.7    | 37.2 | 4.84E+06 | 527.2816 |
| 35 | Ser-Phe-Asp-Ser-Thr         | 5     | 83.5    | 13.5 | 3.71E+06 | 555.2177 |

|    |                     |   |      |      |          |          |
|----|---------------------|---|------|------|----------|----------|
| 36 | Ser-Gly-Val-Gly-Pro | 5 | 83.1 | 11.0 | 4.38E+06 | 415.2067 |
| 37 | Leu-Leu-Arg-Pro-His | 5 | 82.5 | 39.1 | 5.08E+05 | 634.3915 |
| 38 | His-Val-Arg-Glu-Pro | 5 | 82.2 | 34.8 | 3.52E+06 | 636.3344 |
| 39 | Ala-Gly-Lys-Leu-Arg | 5 | 81.7 | 33.1 | 6.07E+06 | 543.3492 |
| 40 | Asn-Lys-Arg-Thr-Pro | 5 | 81.3 | 32.6 | 4.76E+06 | 614.35   |
| 41 | His-Leu-Arg-Asn-Pro | 5 | 93.2 | 34.9 | 3.09E+06 | 635.3503 |
| 42 | Tyr-Leu-His-Leu     | 4 | 97.8 | 43.9 | 1.89E+06 | 544.3009 |
| 43 | Pro-Pro-His-Leu     | 4 | 97.5 | 36.1 | 6.44E+06 | 462.2591 |
| 44 | His-Arg-Pro-Leu     | 4 | 97.2 | 38.2 | 1.27E+07 | 521.3074 |
| 45 | Phe-Leu-His-Leu     | 4 | 97   | 48.9 | 1.03E+06 | 528.306  |
| 46 | Arg-Leu-Ala-Lys     | 4 | 96.7 | 38.3 | 1.71E+07 | 486.3278 |
| 47 | Arg-Val-His-Leu     | 4 | 96.3 | 46.8 | 2.55E+06 | 523.3231 |
| 48 | His-Leu-Pro-Pro     | 4 | 96   | 35.6 | 4.46E+06 | 462.2591 |
| 49 | Glu-Met-Pro-Arg     | 4 | 95.6 | 37.7 | 5.42E+06 | 531.2475 |
| 50 | Lys-Leu-His-Asn     | 4 | 95.5 | 27.5 | 1.05E+07 | 510.2914 |
| 51 | Trp-Lys-Pro-Arg     | 4 | 95.4 | 44.2 | 6.69E+06 | 585.3387 |
| 52 | Arg-Val-Val-Lys     | 4 | 95.4 | 38.2 | 8.45E+06 | 500.3434 |
| 53 | Leu-Val-Lys-Leu     | 4 | 95.2 | 40.7 | 1.15E+06 | 471.342  |
| 54 | His-Leu-His-Val     | 4 | 95.2 | 42.1 | 1.45E+06 | 504.2809 |
| 55 | Leu-Leu-Lys-His     | 4 | 94.8 | 34.8 | 2.35E+06 | 509.3326 |
| 56 | Lys-Val-Asp-Leu     | 4 | 93.9 | 36.4 | 1.02E+07 | 473.2849 |
| 57 | Gln-Arg-Pro-Lys     | 4 | 93.7 | 29.1 | 4.73E+06 | 527.318  |
| 58 | Arg-Phe-Pro-Arg     | 4 | 93.5 | 39.0 | 2.17E+06 | 574.3339 |
| 59 | Glu-Arg-Leu-Gln     | 4 | 93.5 | 33.4 | 4.78E+05 | 544.2969 |
| 60 | Arg-Val-His-Pro     | 4 | 93.1 | 38.7 | 1.53E+08 | 507.2917 |
| 61 | Leu-Lys-His-Pro     | 4 | 93   | 32.8 | 2.78E+06 | 493.3012 |
| 62 | Thr-Arg-Leu-Arg     | 4 | 92.9 | 39.4 | 5.07E+05 | 544.3445 |
| 63 | Glu-Val-Leu-His     | 4 | 92.4 | 40.5 | 8.06E+04 | 496.2645 |
| 64 | Arg-Gln-His-Leu     | 4 | 91.9 | 39.7 | 2.66E+06 | 552.3132 |
| 65 | Leu-Val-Arg-Lys     | 4 | 91.9 | 32.9 | 3.27E+06 | 514.3591 |
| 66 | Phe-Ser-Phe-Asp     | 4 | 91.9 | 29.1 | 6.64E+07 | 514.2064 |
| 67 | Lys-Ser-Lys-Arg     | 4 | 91.8 | 42.8 | 1.84E+06 | 517.3336 |
| 68 | Leu-Arg-His-Pro     | 4 | 91.7 | 33.7 | 1.34E+07 | 521.3074 |
| 69 | Leu-Pro-Lys-Leu     | 4 | 91.7 | 34.2 | 9.55E+05 | 469.3264 |
| 70 | Lys-Val-Thr-His     | 4 | 91.7 | 30.7 | 1.55E+06 | 483.2805 |
| 71 | Leu-Arg-Phe-Gln     | 4 | 91   | 39.1 | 1.56E+07 | 562.3227 |
| 72 | Pro-Leu-Lys-Pro     | 4 | 90.9 | 43.3 | 1.00E+06 | 453.2951 |

|     |                 |   |      |      |          |          |
|-----|-----------------|---|------|------|----------|----------|
| 73  | Lys-Leu-Val-His | 4 | 90.9 | 36.6 | 1.10E+07 | 495.3169 |
| 74  | Ser-Arg-Lys-Leu | 4 | 90.6 | 41.3 | 9.23E+06 | 502.3227 |
| 75  | Phe-Val-Arg-Pro | 4 | 90.6 | 33.5 | 3.33E+05 | 517.3013 |
| 76  | Lys-Met-Lys-Phe | 4 | 90.2 | 50.7 | 2.03E+06 | 552.3094 |
| 77  | Leu-Gln-His-Leu | 4 | 90.1 | 33.2 | 3.89E+06 | 509.2962 |
| 78  | His-Arg-Pro-Glu | 4 | 90   | 33.8 | 3.26E+07 | 537.2659 |
| 79  | Val-Gln-Leu-Lys | 4 | 89.7 | 38.0 | 3.17E+06 | 486.3166 |
| 80  | Ala-Leu-His-Arg | 4 | 89.5 | 34.1 | 4.35E+06 | 495.2917 |
| 81  | Asn-Lys-Lys-Leu | 4 | 89.1 | 34.0 | 7.93E+06 | 501.3275 |
| 82  | Lys-Lys-Met-Ala | 4 | 89   | 39.7 | 5.41E+06 | 476.2781 |
| 83  | Arg-Leu-His-Leu | 4 | 88.7 | 46.3 | 4.81E+06 | 537.3387 |
| 84  | His-His-Phe-Pro | 4 | 88.4 | 43.7 | 9.95E+05 | 536.2496 |
| 85  | Leu-Pro-Lys-Pro | 4 | 88.2 | 38.5 | 3.96E+06 | 453.2951 |
| 86  | Glu-Pro-Lys-His | 4 | 88.2 | 32.4 | 4.64E+06 | 509.2598 |
| 87  | Leu-Val-Glu-Lys | 4 | 87.8 | 21.9 | 1.08E+06 | 487.3006 |
| 88  | Val-Glu-Arg-Leu | 4 | 87.2 | 33.1 | 1.32E+06 | 515.3067 |
| 89  | Pro-Asp-Arg-His | 4 | 87   | 33.7 | 5.30E+06 | 523.2503 |
| 90  | Val-Asn-Leu-Ala | 4 | 86.5 | 12.2 | 9.64E+07 | 415.2431 |
| 91  | Arg-Gln-Leu-Lys | 4 | 86.1 | 33.1 | 6.07E+06 | 543.3492 |
| 92  | Arg-Thr-Pro-Leu | 4 | 85.8 | 34.3 | 2.09E+06 | 485.2962 |
| 93  | Lys-Leu-Gln-Leu | 4 | 85.7 | 41.1 | 2.81E+06 | 500.3322 |
| 94  | Pro-Glu-Arg-Lys | 4 | 85.5 | 34.0 | 2.31E+06 | 528.302  |
| 95  | Glu-Ser-Phe-Glu | 4 | 85.3 | 13.4 | 1.75E+06 | 510.1962 |
| 96  | Asp-Ser-Ser-Phe | 4 | 85.2 | 17.7 | 1.27E+06 | 454.17   |
| 97  | Thr-Pro-Pro-Arg | 4 | 84.8 | 8.4  | 2.77E+05 | 469.2649 |
| 98  | Asn-Lys-His-Leu | 4 | 84.8 | 34.7 | 3.23E+07 | 510.2914 |
| 99  | Lys-Ala-Phe-Phe | 4 | 84.3 | 33.3 | 8.02E+05 | 511.2794 |
| 100 | Leu-Arg-Pro-Arg | 4 | 84.2 | 37.8 | 9.17E+06 | 540.3496 |
| 101 | Lys-Leu-Asn-His | 4 | 84   | 32.4 | 2.91E+07 | 510.2914 |
| 102 | Leu-Ser-Phe-Asp | 4 | 83.5 | 22.0 | 9.34E+06 | 480.222  |
| 103 | Val-Lys-Val-Arg | 4 | 82.3 | 39.2 | 1.18E+06 | 500.3434 |
| 104 | Ser-Asp-Phe-Val | 4 | 81.7 | 22.3 | 2.35E+06 | 466.2064 |
| 105 | His-Gly-Leu-Pro | 4 | 81.7 | 32.6 | 1.11E+07 | 422.2278 |
| 106 | His-Ala-Leu-Pro | 4 | 81.7 | 34.4 | 4.80E+06 | 436.2434 |
| 107 | Leu-Lys-Ala-Pro | 4 | 81.3 | 36.7 | 8.39E+06 | 427.2794 |
| 108 | Asn-Leu-Gln-Lys | 4 | 81   | 40.3 | 1.05E+06 | 501.2911 |
| 109 | Phe-Gly-Arg-Pro | 4 | 80.8 | 29.5 | 2.14E+06 | 475.2543 |

|     |                 |   |      |      |          |          |
|-----|-----------------|---|------|------|----------|----------|
| 110 | Val-Val-Val-Ala | 4 | 80.6 | 15.3 | 3.67E+06 | 386.2529 |
| 111 | His-Arg-Val     | 3 | 89   | 34.8 | 1.94E+06 | 410.239  |
| 112 | Arg-Arg-Ser     | 3 | 85.5 | 31.6 | 1.96E+07 | 417.2448 |
| 113 | Arg-Arg-Asn     | 3 | 85.3 | 30.8 | 1.70E+07 | 444.2557 |

---
